# Supplementary material for: Distinct phosphorylation and dephosphorylation dynamics of protein arginine kinases revealed by fluorescent activity probes
Source: Royal Society of Chemistry journal article supplement (doi:10.1039/c9cc03285a), 2019-01-01
Supplement: c9cc03285a1.pdf [file c9cc03285a1.pdf]

## Supplementary Information

### Distinct phosphorylation and dephosphorylation dynamics of a protein arginine kinase revealed by fluorescent activity probes

Hoyoung Jung,<sup>a</sup> Yigun Choi,<sup>a</sup> Donghee Lee,<sup>a</sup> Jeong Kon Seo<sup>b</sup>, and Jung-Min Kee<sup>\*,a</sup>

<sup>a</sup> Department of Chemistry, Ulsan National Institute of Science and Technology (UNIST), Ulsan 44919, Korea

<sup>b</sup> UNIST Central Research Facilities (UCRF), UNIST, Ulsan 44919, Korea

\* Corresponding author: jmkee@unist.ac.kr (J.-M. Kee)

## Table of Contents

|                                                                                |    |
|--------------------------------------------------------------------------------|----|
| Supplementary Figures .....                                                    | 3  |
| General Materials.....                                                         | 9  |
| General Methods.....                                                           | 10 |
| General Protocols of Solid Phase Peptide Synthesis (SPPS).....                 | 11 |
| Western Blotting Using Anti-pArg Antibody.....                                 | 12 |
| Plasmid Construction for Recombinant Protein .....                             | 13 |
| General Procedures for Fluorescent Real-Time Enzyme Activity with Probes ..... | 14 |
| Autophosphorylation effects on McsB kinase activity .....                      | 15 |
| ATP/ADP Quantification with IPRP-HPLC.....                                     | 16 |
| Validation of McsB reversibility .....                                         | 17 |
| Ap <sub>5</sub> A effect test on McsB reactivities.....                        | 18 |
| Validation of [ATP]/[ADP] effect on protein pArg level by Western blot .....   | 20 |
| Preparation of Plasmids .....                                                  | 21 |

|                                                                                                             |    |
|-------------------------------------------------------------------------------------------------------------|----|
| Site-directed mutagenesis .....                                                                             | 21 |
| Overlap extension PCR.....                                                                                  | 22 |
| Cloning of <i>B. subtilis</i> proteins .....                                                                | 23 |
| Expression and Purification of Recombinant Proteins .....                                                   | 24 |
| <i>Geobacillus stearothermophilus</i> McsB-His <sub>6</sub> .....                                           | 24 |
| <i>Geobacillus stearothermophilus</i> McsB <sup>E122A</sup> -His <sub>6</sub> .....                         | 24 |
| <i>Geobacillus stearothermophilus</i> CtsR-His <sub>6</sub> .....                                           | 25 |
| <i>Geobacillus stearothermophilus</i> YwIE-His <sub>6</sub> and YwIE <sup>C9S</sup> -His <sub>6</sub> ..... | 25 |
| <i>Bacillus subtilis</i> McsB-His <sub>6</sub> .....                                                        | 26 |
| <i>Bacillus subtilis</i> McsA-His <sub>6</sub> .....                                                        | 26 |
| <i>Bacillus subtilis</i> CtsR-His <sub>6</sub> .....                                                        | 26 |
| Summary of the recombinant protein overexpression and cell lysis conditions.....                            | 27 |
| <i>In vitro</i> Phosphorylation of a Synthetic Peptide to Monitor McsB Activity .....                       | 28 |
| Experimental Procedure and Spectroscopic Data .....                                                         | 30 |
| On-Resin Alkylation of Peptides with Sox-Br .....                                                           | 30 |
| Analytical data of WT CtsR and Sox-CtsR(-3) to (+3) .....                                                   | 31 |
| References.....                                                                                             | 44 |

## Supplementary Figures

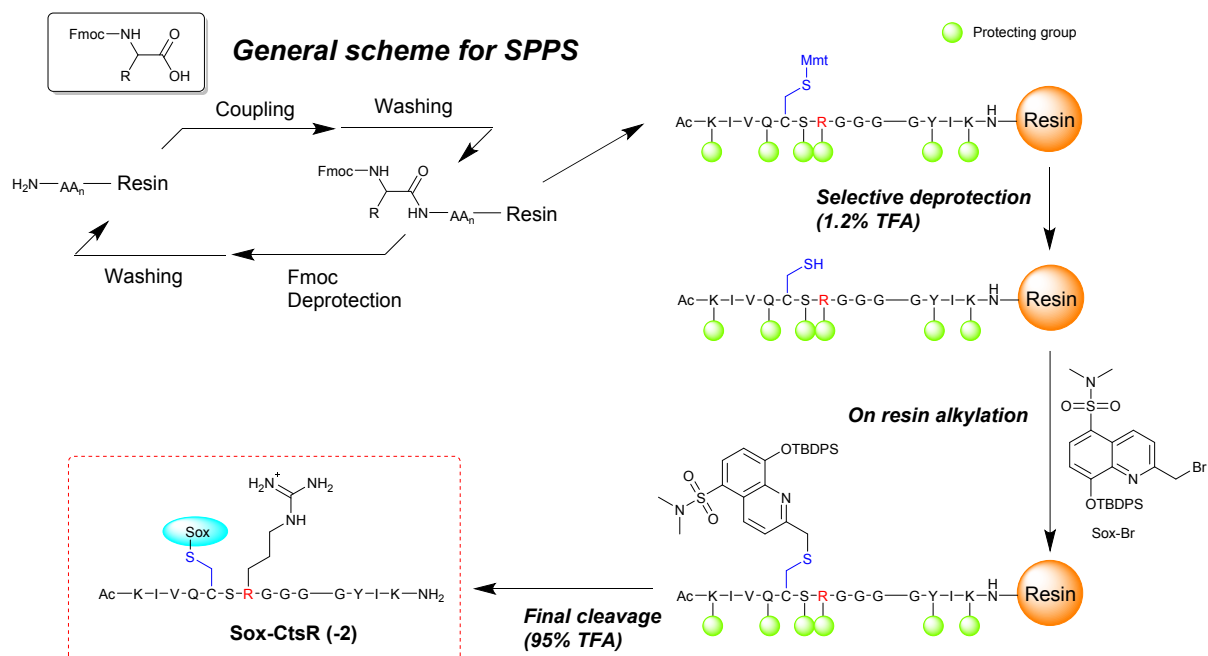

**Fig. S 1. Preparation of fluorescent probes for Arg phosphorylation.**

**Table S 1. Sequence of Sox-CtsR probes**

| Entry | Compound     | Peptide sequence                       |
|-------|--------------|----------------------------------------|
| (-3)  | Sox-CtsR(-3) | Ac-KVI(CSox)SKRGGGGYIK-NH <sub>2</sub> |
| (-2)  | Sox-CtsR(-2) | Ac-KVIQ(CSox)KRGGGGYIK-NH <sub>2</sub> |
| (-1)  | Sox-CtsR(-1) | Ac-KVIQS(CSox)RGGGGYIK-NH <sub>2</sub> |
| (+1)  | Sox-CtsR(+1) | Ac-KVIQSKR(CSox)GGGYIK-NH <sub>2</sub> |
| (+2)  | Sox-CtsR(+2) | Ac-KVIQSKRG(CSox)GGYIK-NH <sub>2</sub> |
| (+3)  | Sox-CtsR(+3) | Ac-KVIQSKRGG(CSox)GYIK-NH <sub>2</sub> |

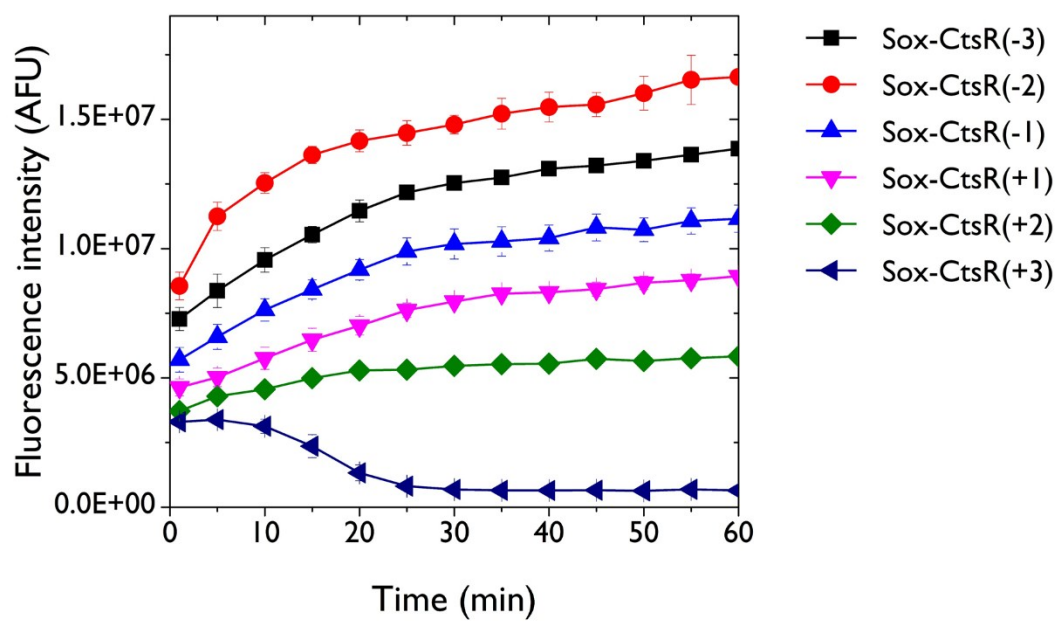

**Fig. S 2. Increment in the fluorescence signal of probes upon phosphorylation by McsB.**

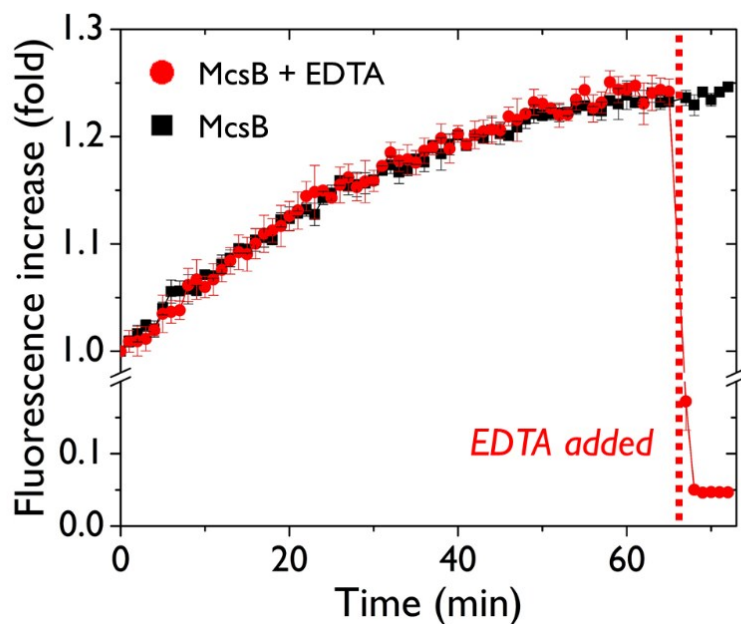

**Fig. S 3. Effect of EDTA treatment to the probe fluorescence.**

For the kinase reaction, two separate batches of 5  $\mu$ M McsB, 50  $\mu$ M Sox-CtsR(-2), 1.5 mM ATP, and 20 mM  $\text{MgCl}_2$  were incubated at for phosphorylation. After 65 min, 20 mM EDTA was added to one batch (red dots) to competitively chelate  $\text{Mg}^{2+}$ , thereby reducing the CHEF effect. Despite the dramatic fluorescence decrease in the EDTA-treated sample, both showed a comparable degree of Arg-phosphorylation (20.8% for control vs. 18.6% for EDTA-treated), as quantified by independent HPLC measurements.

**Table S 2. Quantification of nucleotides, pArg and Arg probe (Fig 4).**

|      | ADP only |        |       | ADP + McsB |        |       | pArg-Sox-CtsR(-2) |        |
|------|----------|--------|-------|------------|--------|-------|-------------------|--------|
|      | AMP      | ADP    | ATP   | AMP        | ADP    | ATP   | Arg               | pArg   |
| pmol | 242.0    | 3030.0 | 103.0 | 428.0      | 1763.0 | 231.0 | 352.0             | 1355.0 |
| %    | 7.2      | 89.8   | 3.1   | 17.7       | 72.8   | 9.5   | 20.6              | 79.4   |

|      | ADP + pArg-Sox-CtsR(-2) |        |       |       |        |
|------|-------------------------|--------|-------|-------|--------|
|      | AMP                     | ADP    | ATP   | Arg   | pArg   |
| pmol | 200.0                   | 2585.0 | 171.0 | 423.0 | 1189.0 |
| %    | 6.8                     | 87.4   | 5.8   | 26.2  | 73.8   |

|      | ADP + McsB E122A + pArg-Sox-CtsR(-2) |        |       |       |        |
|------|--------------------------------------|--------|-------|-------|--------|
|      | AMP                                  | ADP    | ATP   | Arg   | pArg   |
| pmol | 445.7                                | 2575.9 | 121.1 | 181.5 | 1273.8 |
| %    | 14.2                                 | 82.0   | 3.8   | 12.5  | 87.5   |

|      | ADP + McsB + pArg-Sox-CtsR(-2) |        |        |        |       |
|------|--------------------------------|--------|--------|--------|-------|
|      | AMP                            | ADP    | ATP    | Arg    | pArg  |
| pmol | 309.0                          | 1596.0 | 1286.0 | 1228.0 | 261.0 |
| %    | 9.7                            | 50.0   | 40.3   | 82.5   | 17.5  |

**Table S 3. Estimation of equilibrium constant for McsB reverse reaction**

| Equilibrium constant equation              | Entry | [ATP]/[ADP] | [Arg]/[pArg] | $K_{eq}'$ |
|--------------------------------------------|-------|-------------|--------------|-----------|
| $K_{eq}' = \frac{[ATP][Arg]}{[ADP][pArg]}$ | 1     | 1.71        | 3.96         | 6.77      |
|                                            | 2     | 4.14        | 1.25         | 5.20      |
|                                            | 3     | 2.48        | 3.77         | 9.34      |
|                                            | 4     | 2.91        | 1.73         | 5.04      |
|                                            | 5     | 3.53        | 1.22         | 4.29      |



## General Materials

All reagents were purchased from Alfa Aesar and TCI without further purification unless otherwise noted. All biological reagents (unless other noted) were purchased from Bio-rad (Hercules, CA). All buffering salts and organic solvents were purchased from Daejung (Siheung, Republic of Korea). Tris/HCl salt, Tris base, B-PER™ Bacterial Protein Extraction Reagent and HisPur Ni-NTA Resin were purchased from Fisher Scientific (Pittsburgh, PA). Bovine serum albumin (BSA), dithiothreitol (DTT), adenosine 5'-triphosphate disodium salt (ATP), 5'-diphosphate disodium salt (ADP), 5'-monophosphate disodium salt (AMP), P<sup>1</sup>, P<sup>5</sup>-Di(adenosine-5') pentaphosphate pentasodium salt (Ap<sub>5</sub>A), Protease Inhibitor Cocktail powder for bacterial extracts and Pyruvate Kinase from rabbit muscle were purchased from Sigma-Aldrich (St. Louis, MO). Coomassie brilliant blue, glycerol and magnesium chloride hexahydrate (MgCl<sub>2</sub>) were purchased from Biosesang (Seongnam, Republic of Korea). HBTU and Rink-amide resin were purchased from Matrix innovation (Quebec, Canada). All amino acids used in peptide synthesis (unless otherwise noted) were purchased from GL Biochem (Shanghai, China). Fmoc-Cys(Mmt)-OH was purchased from Bepharma (Shanghai, China). LB Broth and LB Agar were purchased from Affymetrix (Santa Clara, CA). Phenylmethylsulfonyl fluoride (PMSF, protease inhibitor) was purchased from Alfa Aesar (Ward Hill, MA). Ampicillin sodium salt and isopropyl β-D-1-thiogalactopyranoside (IPTG) were from MP Biomedicals (Santa Ana, CA).

## General Methods

Analytical RP-HPLC was performed on Agilent 1200 series instruments equipped with a C18 InertSustain (5  $\mu$ m, 4.6 x 150 mm) column at a flow rate of 1 mL/min employing gradients of solvent A (0.1% trifluoroacetic acid (TFA) in water) and solvent B (90% acetonitrile in water with 0.1% TFA). For all analytical RP-HPLC runs a two-minute isocratic period in initial conditions was followed by 8 or 20-minute linear gradient with increasing solvent B concentration. The solvent gradients are specified in each of HPLC experiment (see below). We performed semi-preparative RP-HPLC with a C18 InertSustain (5  $\mu$ m, 10 x 250 mm) at a flow rate of 2.5 mL/min. All semi-preparative RP-HPLC runs were carried out employing gradients of solvent A (0.1% TFA in water) and solvent B (90% acetonitrile in water with 0.1% TFA). For all semi-preparative RP-HPLC runs, a five-minute isocratic period in initial conditions was followed by a 20 or 40-minute linear gradient with increasing solvent B concentration. Cells were lysed using a Branson Ultrasonic Corp 250 DIG SONIFIER 115V (Fisher Scientific, Pittsburgh, PA). Samples were lyophilized on a Scanvac CoolSafe Freeze Dryer. The pH of buffers was measured with a pH meter, Orion Star A211 (Thermo Scientific, Waltham, MA). Mass spectra were obtained on a Ultraflex III-MALDI-TOF/TOF (Bruker BioSpin, Billerica, MA), a Q Exactive™ Hybrid Quadrupole-Orbitrap™, or a Q Exactive™ plus Hybrid Quadrupole-Orbitrap™ (Thermo Scientific, Waltham, MA). Absorbance and fluorescence were measured with a SpectraMax i3x (Molecular devices, Sunnyvale, CA). Chemiluminescence from western blot analysis was measured with a ChemiDoc™ XRS+ System (Bio-Rad, Hercules, CA).

## General Protocols of Solid Phase Peptide Synthesis (SPPS)

The peptides were synthesized on Rink amide resin (Matrix) on a 0.1 mmol scale. The resin was swollen by incubation in DMF with gentle agitation (by bubbling with N<sub>2</sub>). After 30 min, the resin was washed with two flow washes and one final batch wash with DMF. All the subsequent resin washing steps were carried out using this method. Fmoc deprotections were carried out using a 20% piperidine in DMF in two steps (1 min incubation and 20 min deprotection). Then, the resin was washed. Amino acids were coupled using HBTU/ DIPEA as the activating agents. Desired amino acid (0.5 mmol) was weighed and dissolved in 1 mL of 0.49 M HBTU solution (in DMF) and DIPEA (1 mmol) was added immediately. The mixture was thoroughly mixed and allowed to be activated for 3~5 min, and the solution was poured into the resin. The reaction mixture was agitated by bubbling N<sub>2</sub> for 30 minutes. Then, the resin was washed. With the last N-terminal residue, the acetylation was performed by incubating the resin with 20 mol equiv. of Ac<sub>2</sub>O and 40 mol equiv. of DIPEA in DMF for 10 min (repeat 2 times). The peptide was cleaved from the resin by treating with a mixture of 95% TFA, 2.5% triisopropylsilane (TIPS) and 2.5% water for 1.5 hr at room temperature. The cleaved peptide was precipitated in ice-cold ethyl ether. The peptide precipitate was collected by filtration or centrifugation, and then dissolved in 50% HPLC solvent B to separate from the resin. The crude peptide was purified by preparative RP-HPLC.

## Western Blotting Using Anti-pArg Antibody

The pan anti-pArg antibody was generously donated by Prof. Paul Thompson (University of Massachusetts Medical School). Protein samples were diluted into 4× basic loading buffer and incubated for 5 min at RT and resolved by SDS-PAGE. The resolved proteins were electroblotted onto a PVDF membrane (Bio-Rad; cat. no.: 162-0177) in Towbin buffer with 20% MeOH and 0.02% SDS at 75 V (constant 210 mA) for 1.5 hr at 4°C. The membrane was blocked with 3% BSA in TBS-T for 1 hr at RT. The membrane was then incubated with anti-pArg antibody (1:3,000) diluted in the blocking solution (3% BSA in TBS-T) for 1 hr at RT or 12 hr at 4°C. The membrane was washed with TBS-T (3 × 5 min) and then incubated with goat anti-rabbit IgG-HRP conjugate (Bio-Rad; cat. no. 170-6515; diluted 1:5,000 in TBS-T) for 30 min at RT. The membrane was washed with TBS-T (3 × 5 min), drained and incubated with ECL chemiluminescence substrate solution (Dongin LS; cat. no. ECL-PS100) for 3 min at RT. The chemiluminescence from the membrane was imaged using Biorad ChemiDoc™ XRS+ system.

4× loading buffer: 250 mM Tris-HCl (pH 6.8), 0.2% (w/v) bromophenol blue,  
40% (v/v) glycerol, 10 mM DTT, 8% (w/v) SDS

5× gel running buffer: 125 mM Tris, 960 mM Glycine, 0.5% (w/v) SDS, pH 8.3

5× Towbin buffer: 125 mM Tris, 960 mM Glycine, pH 8.3

TBS-T: 50 mM Tris, 150 mM NaCl, pH 8.5 with 0.1% (v/v) Tween 20

## Plasmid Construction for Recombinant Protein

Several plasmids were prepared by PCR-based restriction-free cloning method. Primers were designed considering each vector and template to reach the appropriated melting temperature. Primers were synthesized at Macrogen (Seoul, Republic of Korea). PCR-amplified megaprimers were incorporated into a pET21a(+) vector by overlap-extension PCR. For overlap-extension PCRs, Phusion High-Fidelity PCR Master Mix with HF Buffer (Thermo Scientific, Cat. No.: F531S) was used. MAX Efficiency® DH5α TM Chemically Competent Cells (Invitrogen, Cat. No.: 18258-012) was used as the transformation host. All plasmid sequences were confirmed by DNA sequencing (Macrogen, Korea).

### Overlap-extension PCR

PCRs were performed according to the literature.<sup>1</sup> Primers were diluted into 50 μM with distilled water. For megaprimer synthesis, 10 μL of 2 X Phusion High-Fidelity PCR Master Mix was added and 2 μL of forward and reverse primer respectively. Then, 1 μL of the respective template was added (100 ng/μL). Distilled water was added to the final volume of 20 μL. PCRs were carried out following the manufacturer's instruction. Finally, the megaprimer was purified by 0.8 % agarose gel electrophoresis followed by extraction with AccuPrep® Gel Purification Kit (Bioneer, Cat. No.: K-3035). The product megaprimer concentration was measured by Nanodrop®.

For overlap-extension PCR, to a 10 μL of 2 X Phusion High-Fidelity PCR Master Mix, 20~40 ng of vector and 100 ng of megaprimer were added. Final volume was adjusted to 20 μL with distilled water. Overlap-extension PCRs were run using the following parameters. Final product was treated with FastDigest DpnI (Thermo Scientific, Cat. No.: FD1703) for 5 min at 37°C according to the manufacturer's instruction to remove the original vector template, followed by transformation to DH5α and Mini-prep for DNA sequencing.

**Table S 4. Method of overlap-extension PCR**

| Step                      |              | Temperature  | Time    |
|---------------------------|--------------|--------------|---------|
| Initial denaturation      |              | 96°C         | 30 sec  |
| Cycles<br>(25~30 repeats) | Denaturation | 96°C         | 30 sec  |
|                           | Annealing    | 55°C to 65°C | 60 sec  |
|                           | Extension    | 72°C         | 2-3 min |
| Final extension           |              | 72°C         | 7 min   |

## General Procedures for Fluorescent Real-Time Enzyme Activity with Probes

*In vitro* phosphorylation and dephosphorylation assays were performed in 25 mM HEPES, 300 mM KCl, pH 7.5 buffer with Gs McsB or in 25 mM Tris, 300 mM KCl, pH 7.5 with Bs McsB. Enzyme activities were monitored with fluorescence measurements ( $\lambda_{\text{ex}}/\lambda_{\text{em}}=360/500$  nm) at 40°C. Reaction volume was 200  $\mu\text{L}$  and the experiments were performed in triplicates on black 96 well plate. Sox-CtsR(-2) and McsB were premixed and activated at 40°C for 5 min. Typically, the reaction was started by adding ATP solution.

**Table S 5. Reagents for fluorescent phosphorylation and dephosphorylation assays**

| Reagents             | Stock concentration | Final concentration |
|----------------------|---------------------|---------------------|
| Sox-CtsR(-2)         | 500 $\mu\text{M}$   | 50 $\mu\text{M}$    |
| McsB                 | 15 $\mu\text{M}$    | 5 $\mu\text{M}$     |
| McsA                 | 25 $\mu\text{M}$    | 5 $\mu\text{M}$     |
| YwlE                 | 66 $\mu\text{M}$    | 3 $\mu\text{M}$     |
| Pyruvate kinase (PK) | 14 $\mu\text{M}$    | 700 nM              |
| ATP                  | 30 mM               | 1.5 mM              |
| MgCl <sub>2</sub>    | 200 mM              | 20 mM               |
| PEP                  | 20 mM               | 0.5 mM              |

## Autophosphorylation effects on McsB kinase activity

To test the effect of McsB autophosphorylation on its kinase activity, batches of McsB with various pArg levels were prepared (Table S 6). Excess nucleotides or enzymes were removed by size exclusion chromatography to yield pure McsB. Fluorescence assays with Sox-CtsR(-2) probe were conducted in same conditions with Table S 5.

**Table S 6. Preparation of McsB with various pArg level**

| Entry            | Reaction condition                                                        | pArg quantification                                                                                                                                                                                        |
|------------------|---------------------------------------------------------------------------|------------------------------------------------------------------------------------------------------------------------------------------------------------------------------------------------------------|
| ① pArg rich McsB | Gs McsB + PK + PEP + ATP<br>→ Size exclusion chromatography               | 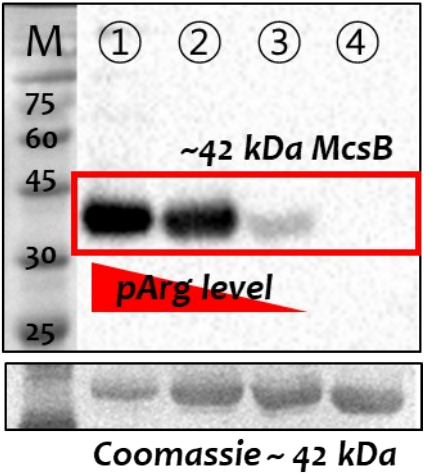 <p>M ① ② ③ ④</p> <p>75<br/>60<br/>45<br/>30<br/>25</p> <p>~42 kDa McsB</p> <p>pArg level</p> <p>Coomassie ~ 42 kDa</p> |
| ② Wild type McsB | Gs McsB, no reaction<br>→ Size exclusion chromatography                   |                                                                                                                                                                                                            |
| ③ pArg poor McsB | Gs McsB + YwIE<br>→ Size exclusion chromatography                         |                                                                                                                                                                                                            |
| ④ Mutant McsB    | Gs McsB <sup>E122A</sup> , no reaction<br>→ Size exclusion chromatography |                                                                                                                                                                                                            |

## ATP/ADP Quantification with IPRP-HPLC

ATP and ADP were quantified by ion-pairing reverse phase HPLC (IPRP-HPLC) following the literature protocols with slight modifications.<sup>2</sup> The modified analysis condition is given below.

Column: C18 InertSustain (5  $\mu$ m, 10 x 250 mm)

Buffer A: 5 mM tetrabutylammonium hydroxide(TBA-OH), 30 mM KH<sub>2</sub>PO<sub>4</sub>, pH 6

Buffer B: 35% buffer A + 65% acetonitrile

Gradient: 10-55B, 1 ml/min over 20 min linear gradient

Standard nucleotides mixture was quantified (**Fig. S4**).

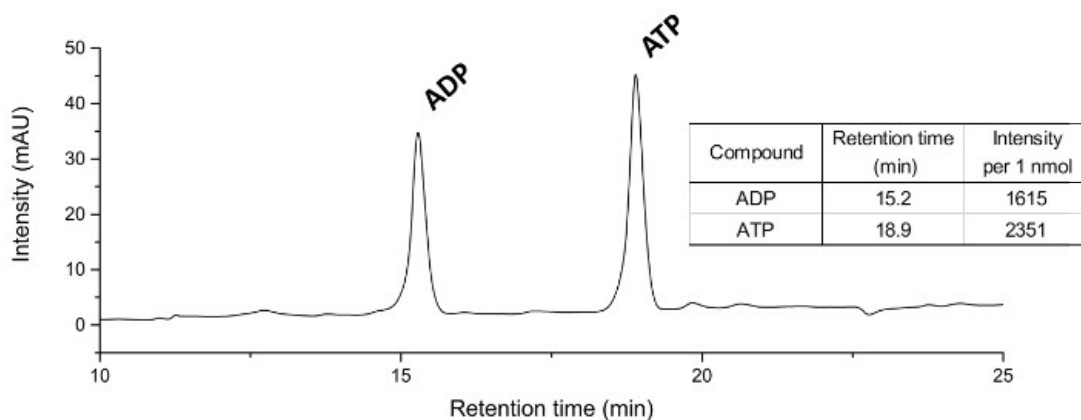

**Fig. S 4. Quantification of ATP and ADP with IPRP-HPLC**



## Validation of McsB reversibility

pArg-Sox-CtsR(-2) peptide was prepared through *in vitro* phosphorylation in presence of PK and PEP for higher efficiency. Peptide phosphorylation was monitored through HPLC. Phosphorylated peptide, pArg-Sox-CtsR(-2) was purified by semi preparative RP-HPLC.

Semi preparative RP-HPLC method: 25-35B, 2.5 ml/min over 20 min

pArg-Sox-CtsR(-2) was incubated with McsB, MgCl<sub>2</sub> and ADP at 40°C with same buffer with fluorescence assay. By time, remaining ADP and newly generated ATP amount were quantified with IPRP-HPLC, as well as pArg and Arg-Sox-CtsR(-2) peptides through RP-HPLC. All experiments were triplicated.

**Table S 7. Reagents for McsB reversibility tests with the pArg-peptide probe**

| Reagents          | Stock concentration | Final concentration |
|-------------------|---------------------|---------------------|
| pArg-Sox-CtsR(-2) | 350 $\mu$ M         | 50 $\mu$ M          |
| Gs McsB           | 12 $\mu$ M          | 5 $\mu$ M           |
| Bs McsB           | 7 $\mu$ M           | 3.5 $\mu$ M         |
| Bs McsA           | 22 $\mu$ M          | 3.5 ~ 7 $\mu$ M     |
| ADP               | 2 mM                | 100 $\mu$ M         |
| MgCl <sub>2</sub> | 200 mM              | 5 mM                |

## Ap<sub>5</sub>A effect test on McsB reactivities

pArg-Sox-CtsR(-2) or Sox-CtsR(-2) was incubated with McsB, MgCl<sub>2</sub> and ADP at 40°C with the same buffer for fluorescence assays in the presence of Ap<sub>5</sub>A. Then, fluorescence change was monitored with plate reader. Over time, pArg peptide was dephosphorylated into Arg, decreasing the fluorescence intensity. Furthermore, remaining ADP and newly generated ATP amount were quantified with IPRP-HPLC, as well as pArg and Arg-Sox-CtsR(-2) peptides through RP-HPLC. All experiments were triplicated.

**Table S 8. Reagents for Ap<sub>5</sub>A effect test on McsB reactivities**

| Reagents          | Stock concentration | Final concentration |
|-------------------|---------------------|---------------------|
| pArg-Sox-CtsR(-2) | 350 $\mu$ M         | 50 $\mu$ M          |
| Gs McsB           | 12 $\mu$ M          | 5 $\mu$ M           |
| ATP               | 30 mM               | 1.5 mM              |
| ADP               | 2 mM                | 100 $\mu$ M         |
| MgCl <sub>2</sub> | 500 mM              | 5 mM                |
| Ap <sub>5</sub> A | 50 $\mu$ M          | 1 ~10 $\mu$ M       |

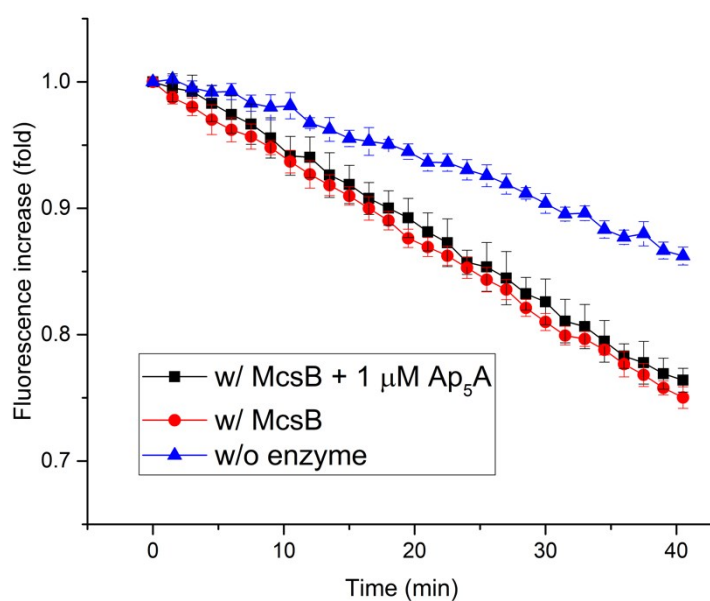

**Fig. S 5. Ap<sub>5</sub>A effect on McsB reverse pArg dephosphorylation reaction**

**Table S 9. Quantification of nucleotides, pArg and Arg probe (Fig. S5 and Fig. S6)**

| Condition | Reverse reaction w/ McsB + 1 $\mu$ M Ap <sub>5</sub> A |        |       |       |       |
|-----------|--------------------------------------------------------|--------|-------|-------|-------|
| Compound  | AMP                                                    | ADP    | ATP   | Arg   | pArg  |
| pmol      | 116.8                                                  | 1331.0 | 179.0 | 455.9 | 305.3 |

| Condition | Reverse reaction w/ McsB |        |       |       |       |
|-----------|--------------------------|--------|-------|-------|-------|
| Compound  | AMP                      | ADP    | ATP   | Arg   | pArg  |
| pmol      | 119.7                    | 1311.7 | 167.3 | 450.7 | 326.6 |

| Condition | Reverse reaction w/o enzyme |        |       |       |       |
|-----------|-----------------------------|--------|-------|-------|-------|
| Compound  | AMP                         | ADP    | ATP   | Arg   | pArg  |
| pmol      | 90.8                        | 1477.3 | 101.8 | 218.1 | 491.6 |

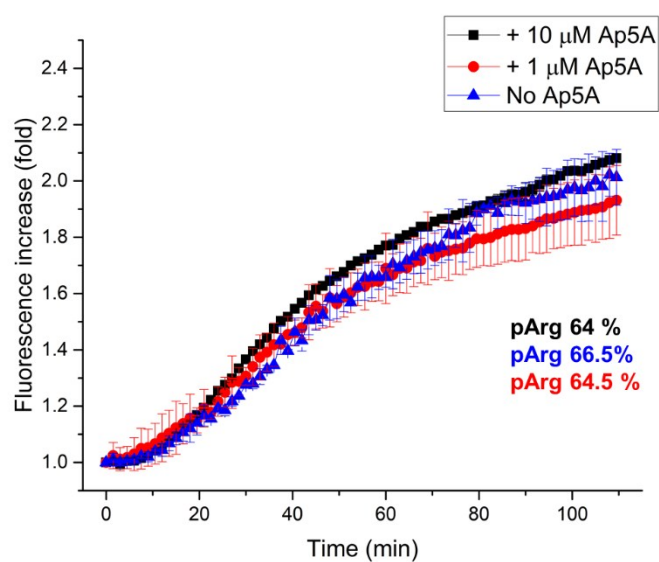

**Fig. S 6. Ap<sub>5</sub>A effect on McsB forward Arg phosphorylation reaction**

### Validation of [ATP]/[ADP] effect on protein pArg level by Western blot

As [ADP] increased, pArg levels of both McsB and CtsR decreased (lane 1 to 4). However, with western blots using the pan-pArg antibody, it was difficult to observe the McsB-mediated pArg dephosphorylation by excess [ADP] (comparing lanes 5 and 6, lane 5; pArg dephosphorylation caused by McsB and excess ADP, lane 6; natural decomposition of pArg).

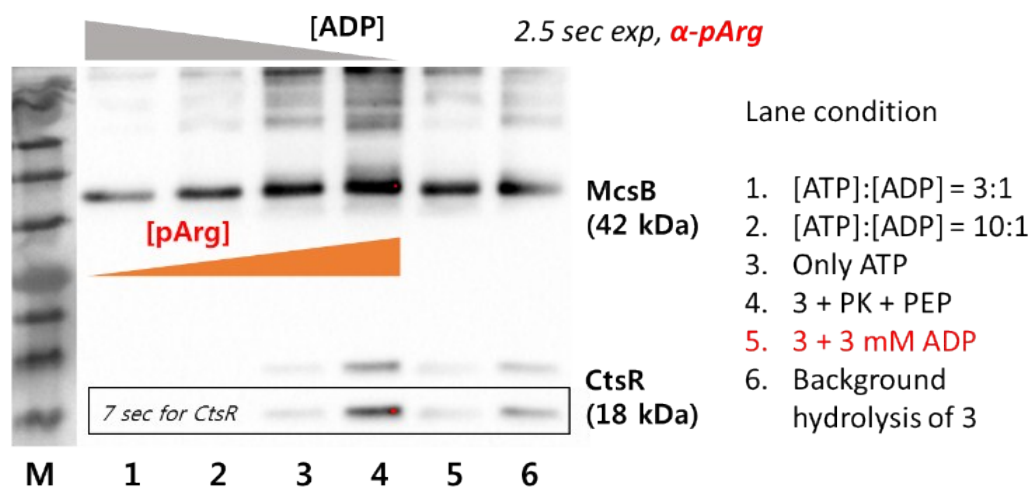

**Fig. S 7. ADP effect on Arg phosphorylation in protein level checked by western blots with a pan-pArg antibody**

5  $\mu$ M McsB, 10  $\mu$ M CtsR, 0.7  $\mu$ M PK, 1.5 mM ATP, 2 mM PEP, 5 mM MgCl<sub>2</sub>, 2 hr for phosphorylation, 45 min for dephosphorylation at 40°C.

## Preparation of Plasmids

The following plasmids were generously donated by Dr. Tim Clausen at Research Institute of Molecular Pathology, Austria.

McsB-His<sub>6</sub>: pET21a(+) derivative containing McsB from *G. stearothermophilus*

CtsR-His<sub>6</sub>: pET21a(+) derivative containing CtsR from *G. stearothermophilus*

YwIE-His<sub>6</sub>: pET21a(+) derivative containing YwIE from *G. stearothermophilus*

## Site-directed mutagenesis

Vector and template: pET21a(+) derivative containing McsB or CtsR from *G. stearothermophilus*

| Gene                                       | Foward                       | Reverse                      |
|--------------------------------------------|------------------------------|------------------------------|
| Gs McsB <sup>E122A</sup> -His <sub>6</sub> | GATCAACGAGGCAGACCATATCC<br>G | CGGATATGGTCTGCCTCGTTGAT<br>C |
| Gs YwIE <sup>C9S</sup> -His <sub>6</sub>   | GTTCGTTAGCACGGGCAATAC        | GTATTGCCCCGTGCTAACGAAC       |

**Table S 10. Primers for Site-directed mutagenesis for inactive mutants**

For the single mutagenesis of the amino acid sequence, site-directed mutagenesis was proceeded with each forward and reverse primers by using Phusion polymerase according to the manufacturer's instruction.

## Overlap extension PCR

Vector: pET21a(+)

Template: pTOP Blunt V2 derivative containing McsA from *B. subtilis* (synthesized from Macrogen)

**Table S 11. Primers for overlap extension PCR of *Bs* McsA**

| Gene                     | Foward                                                      | Reverse                                |
|--------------------------|-------------------------------------------------------------|----------------------------------------|
| Bs McsA-His <sub>6</sub> | GTTTAACTTTAAGAAGGAGATATACA<br>T<br>ATGCACCATCATCATCATCATGGC | CGCCTTTAACATGCGTTA<br>CTCCTGTTCTCCTCAC |

The plasmid Bs McsA-His<sub>6</sub> was prepared in two steps by overlap-extension PCR. First, the Bs McsA-His<sub>6</sub> gene was amplified from its template by Phusion polymerase using forward and reverse primers that contain 5' and 3' sequences that overlap with regions of a modified pET21a(+) plasmid. The resulting product DNA was purified by agarose gel electrophoresis followed by gel extraction using Bioneer gel extraction kit according to the manufacturer's instructions.

In the second step, *Bs* McsA-His<sub>6</sub> gene product was inserted into a modified pET21a(+) plasmid using Phusion polymerase. Then the template plasmid was globally digested using DpnI at 37°C for 5 min.

## Cloning of *B. subtilis* proteins

Template: Genomic DNA of *Bacillus subtilis* (Strain 168, KCTC 2217, the biological resources used in this research were distributed from KCTC)

Vector: pET21a(+)

| Gene                     | Foward                                                                                        | Reverse                                                         |
|--------------------------|-----------------------------------------------------------------------------------------------|-----------------------------------------------------------------|
| Bs McsB-His <sub>6</sub> | CATTCCTCTAGAATAATTTGTTTA<br>A<br>CTTTAAGAAGGAGATATACATATGTC<br>G<br>CTAAAGCATTTTATTCAGGACG    | TCAGTGGTGGTGGTGGTGGTGTAT<br>CGATTCATCCTCCTGTCTTTTCCC            |
| Bs CtsR-His <sub>6</sub> | CATTCCTCTAGAATAATTTGTTTA<br>A<br>CTTTAAGAAGGAGATATACATATGG<br>GA<br>CATAATATTTCTGACATCATTGAAC | TCAGTGGTGGTGGTGGTGGTGTAT<br>TAATTTTAAAGAAGTCAGCATTGC<br>CTTCATC |

**Table S 12. Primers for PCR**

The plasmid *Bs* McsB-His<sub>6</sub> and *Bs* CtsR-His<sub>6</sub> were prepared in two steps by overlap-extension PCR. First, the *Bs* McsB and *Bs* CtsR gene were amplified from *B. subtilis* DNA by Phusion polymerase using forward and reverse primers that contain 5' and 3' sequences that overlap with regions of a modified pET21a(+) plasmid. In the second step, each amplified gene product was inserted into a modified pET21a(+) plasmid using Phusion polymerase. Then the template plasmid was globally digested using DpnI at 37°C for 5 min.

Finally, the resulting product plasmids were used to transform *E. coli* DH5α cells by heat shock (42°C for 45 sec). The transformed bacteria were grown in LB media (no antibiotics) for 1 hr at 37°C and plated onto an ampicillin-containing LB-agar plate. The plate was incubated at 37°C for overnight, and the colonies were individually picked and inoculated into 5 mL LB (with ampicillin 50 µg/mL). The bacteria were grown overnight at 37°C in a shaker and the plasmid DNA was extracted using a Bioneer Miniprep kit according to the manufacturer's instructions. The obtained plasmids were sequenced and used to transform *E. coli* BL21(DE3) cells.

## Expression and Purification of Recombinant Proteins

Expression and purification of recombinant proteins were carried out following the literature<sup>3,4</sup>.

### *Geobacillus stearothermophilus* McsB-His<sub>6</sub>

The plasmid was transformed into *E. coli* BL21(DE3)-pLys strain. One picked up clone was grown in 5 mL LB media supplemented with ampicillin (50 µg/mL) overnight at 37°C. 200 mL of the media was inoculated with 2 mL the overnight culture and grown until its O.D.<sub>600</sub> reached 0.8. The bacteria was induced by 0.5 mM IPTG at 37°C, 200 rpm for 3 hr and then harvested by centrifugation (4000 g, 30 min at 4°C). The cell pellet was re-suspended in the lysis buffer (25 mM HEPES, 300 mM KCl, 2.5 mM PMSF, pH 7.5) and disrupted by sonication (40% amplitude, 5 sec pulse followed by a 10 sec pause, total 2 min). *Gs* McsB-His<sub>6</sub> was purified using the standard His-tag purification protocol according to manufacturer's recommendation, followed by SEC chromatography on a HiLoad 16/600 Superdex 75 pg column equilibrated with 25 mM HEPES, 300 mM KCl, pH 7.5 buffer. Purified *Gs* McsB-His<sub>6</sub> was analyzed by SDS-PAGE and the concentration was determined with the Bradford method.

### *Geobacillus stearothermophilus* McsB<sup>E122A</sup>-His<sub>6</sub>

The plasmid was transformed into *E. coli* BL21(DE3)-pLys strain. One picked up clone was grown in 5 mL LB media supplemented with ampicillin (50 µg/mL) overnight at 37°C. 200 mL of the media was inoculated with 2 mL overnight cultures and grown until its O.D.<sub>600</sub> reached 0.6. The bacteria was induced by 0.5 mM IPTG at 18°C, 200 rpm for 12 hr and then harvested by centrifugation (4000 g, 30 min at 4°C). The cell pellet was re-suspended in the lysis buffer (25 mM Tris, 50 mM NaCl, 2.5 mM PMSF, pH 7.5) and disrupted by sonication (40% amplitude, 5 sec pulse followed by 10 sec pause, total 2 min). *Gs* McsB<sup>E122A</sup>-His<sub>6</sub> was purified using the standard His-tag purification protocol according to manufacturer's recommendation, followed by SEC chromatograph on a HiLoad 16/600 Superdex 75 pg column equilibrated with 25 mM Tris, 50 mM NaCl, pH 7.5 buffer. Purified *Gs* McsB<sup>E122A</sup>-His<sub>6</sub> was analyzed by SDS-PAGE and the concentration was determined with the Bradford method.



### ***Geobacillus stearothermophilus* CtsR-His<sub>6</sub>**

The plasmid was transformed into *E. coli* BL21(DE3)-pLys strain. One picked up clone was grown in 5 mL LB media supplemented with ampicillin (50 µg/mL) overnight at 37°C. 200 mL of the media was inoculated with the 2 mL overnight cultures and grown until its O.D.<sub>600</sub> reached 0.6. The bacteria was induced by 0.5 mM IPTG at 37°C, 200 rpm for 3 hr and then harvested by centrifugation (4000 g, 30 min at 4°C). The cell pellet was re-suspended in the lysis buffer (25 mM Tris, 300 mM KCl, 2.5 mM PMSF, pH 7.5) and disrupted by sonication (40% amplitude, 5 sec pulse followed by 10 sec pause, total 2 min). *Gs* CtsR-His<sub>6</sub> was purified using the standard His-tag purification protocol according to manufacturer's recommendation. Purified *Gs* CtsR-His<sub>6</sub> was analyzed by SDS-PAGE and the concentration was determined with the Bradford method.

### ***Geobacillus stearothermophilus* YwIE-His<sub>6</sub> and YwIE<sup>C9S</sup>-His<sub>6</sub>**

Each plasmids were transformed into *E. coli* BL21(DE3)-pLys strain. One picked up clone was grown in 5 mL LB media supplemented with ampicillin (50 µg/mL) overnight at 37°C. 200 mL media was inoculated with the 2 mL overnight cultures and grown until its O.D.<sub>600</sub> reached 0.8. The bacteria was induced by 0.5 mM IPTG at 37°C, 200 rpm for 3 hr and then harvested by centrifugation (4000 g, 30 min at 4°C). Cell pellet was re-suspended in the B-PER complete with 2.5 mM PMSF and incubated at RT until it became clear. *Gs* YwIE-His<sub>6</sub> and YwIE<sup>C9S</sup>-His<sub>6</sub> were purified using the standard His-tag purification protocol according to manufacturer's recommendation. Purified *Gs* YwIE-His<sub>6</sub> and YwIE<sup>C9S</sup>-His<sub>6</sub> were analyzed by SDS-PAGE and the concentration was determined with the Bradford method.

### ***Bacillus subtilis* McsB-His<sub>6</sub>**

The plasmid was transformed into *E. coli* BL21(DE3)-pLys strain. One picked up clone was grown in 5 mL LB media supplemented with ampicillin (50 µg/mL) overnight at 37°C. 200 mL media was inoculated with the 2 mL overnight cultures and grown until its O.D.<sub>600</sub> reached 0.6. The bacteria was induced by 0.5 mM IPTG at 18°C, 200 rpm for 12 hr and then harvested by centrifugation (4000 g, 30 min at 4°C). The cell pellet was re-suspended in the lysis buffer (25 mM Tris, 300 mM KCl, 2.5 mM PMSF, pH 7.5) and disrupted by sonication (40% amplitude, 5 sec pulse followed by 10 sec pause, total 2 min). *Bs* McsB-His<sub>6</sub> was purified using the standard His-tag purification protocol according to manufacturer's recommendation, followed by SEC chromatograph on a HiLoad 16/600 Superdex 75 pg column equilibrated with 25 mM Tris, 300 mM KCl, pH 7.5 buffer. Purified *Bs* McsB-His<sub>6</sub> was analyzed by SDS-PAGE and the concentration was determined with the Bradford method.

### ***Bacillus subtilis* McsA-His<sub>6</sub>**

The plasmid was transformed into *E. coli* BL21(DE3)-pLys strain. One picked up clone was grown in 5 mL LB media supplemented with ampicillin (50 µg/mL) overnight at 37°C. 200 mL media was inoculated with 2 mL overnight cultures and grown until its O.D.<sub>600</sub> reached 0.6. The bacteria was induced by 0.5 mM IPTG at 20°C, 200 rpm for 5 hr and then harvested by centrifugation (4000 g, 30 min at 4°C). Cell pellet was re-suspended in the lysis buffer (25 mM Tris, 300 mM KCl, 1 mM TCEP, 2.5 mM PMSF, pH 7.5) and disrupted by sonication (40% amplitude, 5 sec pulse followed by 10 sec pause, total 2 min). *Bs* McsA-His<sub>6</sub> was purified using standard His-tag purification protocol according to manufacturer's recommendation, followed by SEC chromatograph on a HiLoad 16/600 Superdex 75 pg column equilibrated with 25 mM Tris, 300 mM KCl, 1 mM TCEP, pH 7.5 buffer. Purified *Bs* McsA-His<sub>6</sub> was analyzed by SDS-PAGE and the concentration was determined with the Bradford method.

### ***Bacillus subtilis* CtsR-His<sub>6</sub>**

The plasmid was transformed into *E. coli* BL21(DE3)-pLys strain. One picked up clone was grown in 5 mL LB media supplemented with ampicillin (50 µg/mL) overnight at 37°C. 200 mL media was inoculated with 2 mL overnight cultures and grown until its O.D.<sub>600</sub> reached 0.6. The bacteria was induced by 0.5 mM IPTG at 37°C, 200 rpm for 3 hr and then harvested by centrifugation (4000 g, 30 min, 4°C). Cell pellet was re-suspended in the lysis buffer (25 mM Tris, 300 mM KCl, 2.5 mM PMSF, pH 7.5) and disrupted by sonication (40% amplitude, 5 sec pulse followed by 10 sec pause, total 2 min). *Bs* CtsR-His<sub>6</sub> was purified using the standard His-tag purification protocol according to manufacturer's recommendation. Purified *Bs* CtsR-His<sub>6</sub> was analyzed by SDS-PAGE and the concentration was determined with the Bradford method.

## Summary of the recombinant protein overexpression and cell lysis conditions

| Protein                                    | Induction condition                          | Lysis buffer                                               |
|--------------------------------------------|----------------------------------------------|------------------------------------------------------------|
| Gs McsB-His <sub>6</sub>                   | O.D. 600 = 0.8, 0.5 mM IPTG,<br>3 hr at 37°C | 25 mM HEPES, 300 mM KCl,<br>pH 7.5                         |
| Gs McsB <sup>E122A</sup> -His <sub>6</sub> | O.D. 600 = 0.6, 0.5 mM IPTG,<br>O/N at 18°C  | 25 mM Tris, 50 mM NaCl,<br>pH 7.5                          |
| Gs CtsR- His <sub>6</sub>                  | O.D. 600 = 0.6, 0.5 mM IPTG,<br>3 hr at 37°C | 25 mM Tris, 300 mM KCl,<br>pH 7.5                          |
| Gs YwlE-His <sub>6</sub>                   | O.D. 600 = 0.6, 0.5 mM IPTG,<br>3 hr at 37°C | B-PER buffer<br>(Fisher Scientific, Catalog no.:<br>90084) |
| Gs YwlE <sup>C9S</sup> -His <sub>6</sub>   | O.D. 600 = 0.6, 0.5 mM IPTG,<br>3 hr at 37°C | B-PER buffer<br>(Fisher Scientific, Catalog no.:<br>90084) |
| Bs McsB- His <sub>6</sub>                  | O.D. 600 = 0.6, 0.5 mM IPTG,<br>O/N at 18°C  | 25 mM Tris, 300 mM KCl,<br>pH 7.5                          |
| Bs McsA- His <sub>6</sub>                  | O.D. 600 = 0.6, 0.5 mM IPTG,<br>5 hr at 25°C | 25 mM Tris, 300 mM KCl,<br>1 mM TCEP, pH 7.5               |
| Bs CtsR- His <sub>6</sub>                  | O.D. 600 = 0.6, 0.5 mM IPTG,<br>3 hr at 37°C | 25 mM Tris, 300 mM KCl,<br>pH 7.5                          |

**T**  
**able**  
**S 13.**  
**Reco**  
**mbi**  
**nant**  
**prot**  
**ein**  
**over**  
**expr**  
**essio**  
**n**  
**and**  
**cell**  
**lysis**  
**cond**  
**ition**  
**s**

## ***In vitro* Phosphorylation of a Synthetic Peptide to Monitor McsB Activity**

For the activity test of the recombinant McsB-His<sub>6</sub>, a wild-type CtsR peptide was phosphorylated *in vitro* following the literature protocol with slight modifications.<sup>5</sup> The reaction was carried out in 500  $\mu$ L of 20 mM Tris pH 8.0 buffer with 5 mM MgCl<sub>2</sub>, 1 mM ATP, 13.5  $\mu$ M Gs McsB-His<sub>6</sub> and 50  $\mu$ M peptide. All reactions were carried out at 40°C for 1.5 hr. For the dephosphorylation reaction, the reaction mixture was treated with YwIE-His<sub>6</sub> and incubated for an additional 30 min. Reactions were monitored with analytical reverse-phase HPLC (Inertsil C18, 05-70B, 1 mL/min, over 20 min) and newly formed peaks were characterized by matrix-assisted laser desorption/ionization (MALDI) MS using the matrix containing 2',4'-Dihydroxyacetophenone (DHAP) and diammonium citrate (DAC).

**Table S 14. HPLC retention time profiles of components**

| Compounds                | Retention time |
|--------------------------|----------------|
| ATP                      | 2.9 min        |
| ADP                      | 3.6 min        |
| WT-CtsR peptide          | 10.4 min       |
| Gs McsB-His <sub>6</sub> | 19.0 min       |
| Gs YwIE-His <sub>6</sub> | 16.5 min       |

In the absence of McsB, only the nonphosphorylated peptide was observed. However, with McsB, 50% of the WT-CtsR peptide was phosphorylated within 1.5 hour. When phosphoarginine phosphatase YwIE was added to 50% phosphorylated peptide, the phosphopeptide peak disappeared, suggesting phosphorylation had been on the Arg residue by McsB.

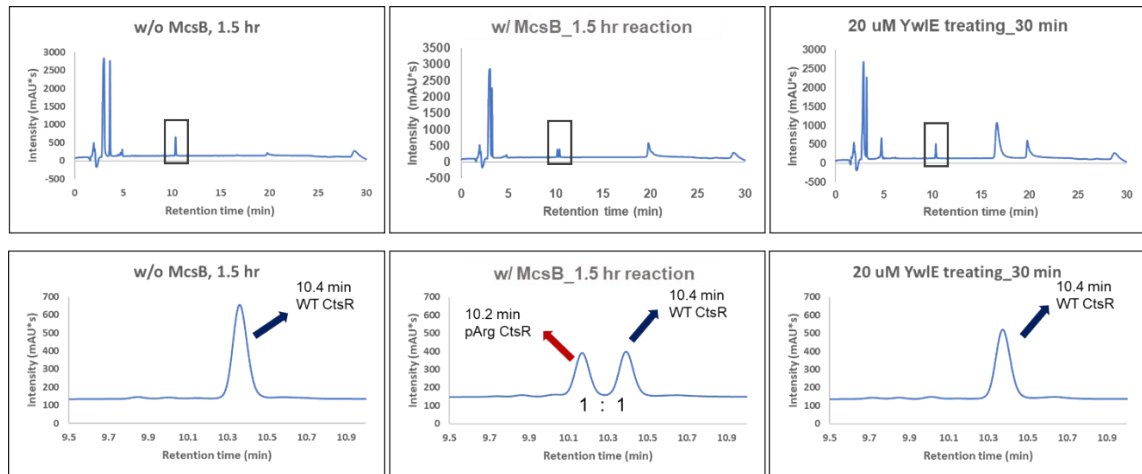

**Fig. S 8. *In vitro* phosphorylation of WT-CtsR peptide with recombinant McsB**

RP-HPLC, C18, 1 mL/min, 05-70B over 20 min, Sig=254 nm, Ref=360 nm

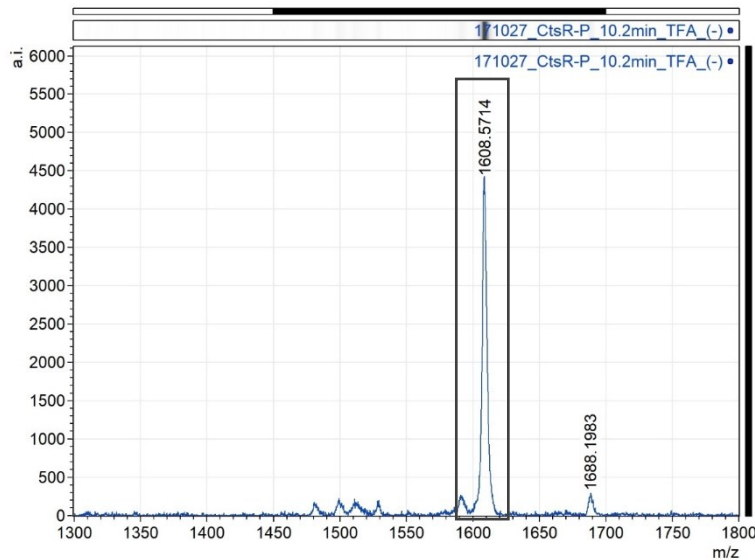

**Fig. S 9. MALDI-TOF (Linear negative mode) of 10.2 min peak**

[M]<sup>-</sup> = WT CtsR peptide, Calculated [pM-H]<sup>-</sup>: 1609.8585 m/z, Observed [pM-H]<sup>-</sup>: 1608.5714 m/z

## Experimental Procedure and Spectroscopic Data

### On-Resin Alkylation of Peptides with Sox-Br

Preparation of Sox-Br and Sox alkylation to Cys was carried out following the procedure in the literature<sup>5,6</sup> with slight modifications. The modified alkylation procedure is given below.

The resin with fully protected peptide (20  $\mu$ mol) was swollen in  $\text{CH}_2\text{Cl}_2$  ( $5 \times 5 \text{ min} \times 2 \text{ mL}$ ) with  $\text{N}_2$  bubbling and drained. To the resin-bound peptide was added 2 mL of 1.2% trifluoroacetic acid (TFA) and 5% TIPS in  $\text{CH}_2\text{Cl}_2$  for the selective Mmt deprotection, and the mixture was agitated by bubbling with  $\text{N}_2$  for 20 min. Yellow color appeared immediately. The Mmt deprotection was repeated (usually more than 6 times) until no more yellow color was observed. Following the deprotection, the resin was washed ( $5 \times \text{CH}_2\text{Cl}_2$  then  $5 \times$  anhydrous DMF). To activate the thiol on Cys, 17.3  $\mu$ L (100  $\mu$ mol) of diisopropylethylamine (DIPEA) dissolved in 430  $\mu$ L of anhydrous DMF was added to the resin. After 2 min, Sox-Br (11.6 mg, 20  $\mu$ mol) in 210  $\mu$ L of anhydrous DMF was added to the resin and it was agitated by bubbling with  $\text{N}_2$  for 1 hr in the dark. After washing with DMF, Sox-Br (11.6 mg, 20  $\mu$ mol) in 210  $\mu$ L of anhydrous DMF was added again for complete alkylation. Following the alkylation, the resin was washed ( $5 \times$  DMF,  $5 \times \text{CH}_2\text{Cl}_2$ ,  $5 \times$  MeOH) and subjected to the final cleavage with 95% TFA, 2.5% TIPS and 2.5% water, followed by the purification via semi-preparative HPLC.

## Analytical data of WT CtsR and Sox-CtsR(-3) to (+3)

**Table S 15. Complete list of synthesized WT-CtsR and Sox-CtsR**

| ENTRY | COMPOUND      | PEPTIDE SEQUENCE                         | CHARACTERIZATION DATA (HPLC, MS) |
|-------|---------------|------------------------------------------|----------------------------------|
| WT    | WT-CtsR       | Ac-KVIQSKRGGGGYIK-NH <sub>2</sub>        | HPLC, MALDI-TOF                  |
|       | WT-CtsRP      | Ac-KVIQSKpRGGGGYIK-NH <sub>2</sub>       | MALDI-TOF                        |
| (-3)  | Sox-CtsR(-3)  | Ac-KVI(CSox)SKRGGGGYIK-NH <sub>2</sub>   | HPLC, ESI-MS (HR-MS)             |
|       | Sox-CtsR(-3)P | Ac-KVI(CSox)SKpRGGGGYIK-NH <sub>2</sub>  | LC-MS/MS (ETD)                   |
| (-2)  | Sox-CtsR(-2)  | Ac-KVIQ(CSox)KRGGGGYIK-NH <sub>2</sub>   | HPLC, ESI-MS (HR-MS)             |
|       | Sox-CtsR(-2)P | Ac-KVIQ(CSox)KpRGGGGYIK-NH <sub>2</sub>  | LC-MS/MS (ETD)                   |
| (-1)  | Sox-CtsR(-1)  | Ac-KVIQS(CSox)RGGGGYIK-NH <sub>2</sub>   | HPLC, ESI-MS (HR-MS)             |
|       | Sox-CtsR(-1)P | Ac-KVIQS(CSox)pRGGGGYIK-NH <sub>2</sub>  | LC-MS/MS (ETD)                   |
| (0)   | Sox-CtsR(0)   | Ac-KVIQSKR(CSox)GGGGYIK-NH <sub>2</sub>  | HPLC, ESI-MS (HR-MS)             |
|       | Sox-CtsR(0)P  | Ac-KVIQSKpR(CSox)GGGGYIK-NH <sub>2</sub> | LC-MS/MS (ETD)                   |
| (1)   | Sox-CtsR(+1)  | Ac-KVIQSKRG(CSox)GGYIK-NH <sub>2</sub>   | HPLC, ESI-MS (HR-MS)             |
|       | Sox-CtsR(+1)P | Ac-KVIQSKpRG(CSox)GGYIK-NH <sub>2</sub>  | HPLC, MALDI-TOF, LC-MS/MS (ETD)  |
| (2)   | Sox-CtsR(+2)  | Ac-KVIQSKRGG(CSox)GYIK-NH <sub>2</sub>   | HPLC, ESI-MS (HR-MS)             |
|       | Sox-CtsR(+2)P | Ac-KVIQSKpRGG(CSox)GYIK-NH <sub>2</sub>  | HPLC, MALDI-TOF, LC-MS/MS (ETD)  |
| (3)   | Sox-CtsR(+3)  | Ac-KVIQSKRGG(CSox)GYIK-NH <sub>2</sub>   | HPLC, ESI-MS (HR-MS)             |
|       | Sox-CtsR(+3)P | Ac-KVIQSKpRGG(CSox)GYIK-NH <sub>2</sub>  | LC-MS/MS (ETD)                   |

**Table S 16. Analytical methods for the CtsR peptides**

| Analytical method | Details                                                       |
|-------------------|---------------------------------------------------------------|
| RP-HPLC           | 1 mL/min, 5-70% B over 20 min, Sig=254 nm, Ref=360 nm         |
| MALDI-TOF         | Reflectron-Positive mode unless otherwise noted, DHAP and DAC |
| ESI-MS            | Direct injection, Positive mode, (Resolution 70000)           |
| LC-MS/MS          | Positive, ETD mode                                            |

# **WT-CtsR: Ac-KIVQSKRGGGGYIK-NH<sub>2</sub>**

## HPLC

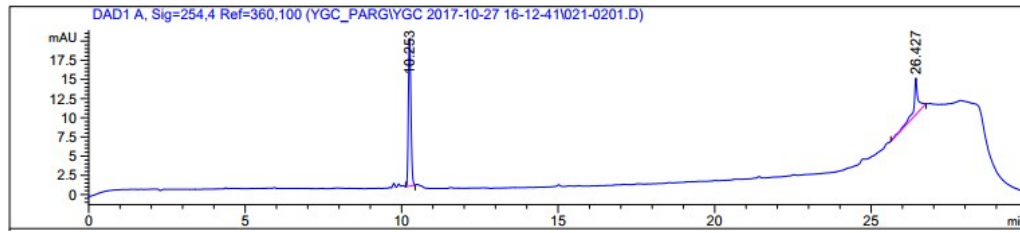

| Peak # | RetTime [min] | Width [min] | Area [mAU*s] | Height [mAU] | Area %  |
|--------|---------------|-------------|--------------|--------------|---------|
| 1      | 10.253        | 0.0857      | 105.15366    | 19.26990     | 68.8808 |
| 2      | 26.427        | 0.1350      | 47.50678     | 4.73697      | 31.1192 |

MALDI-TOF: Calculated [M+H]<sup>+</sup>: 1531.9067 m/z, Observed [M+H]<sup>+</sup>: 1532.0468 m/z

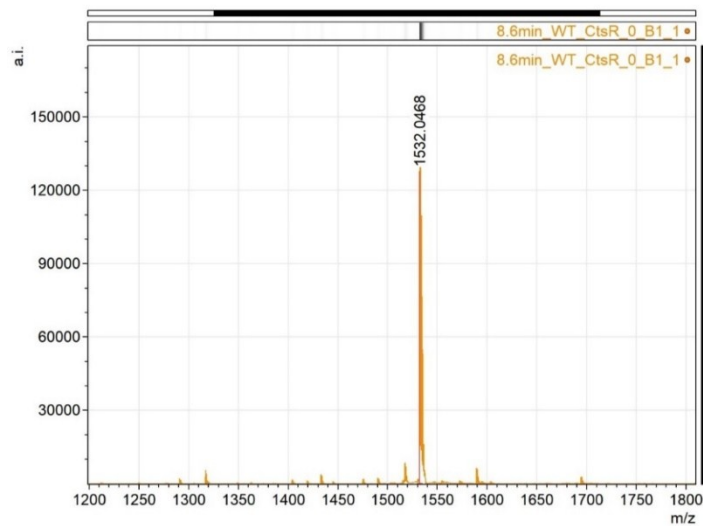



**WT-CtsR: Ac-KIVQSKpRGGGGYIK-NH<sub>2</sub>**

MALDI-TOF (Linear-Negative mode): Calculated [pM-H]<sup>-</sup>: 1609.8585 m/z, Observed [pM-H]<sup>-</sup>: 1608.5714 m/z

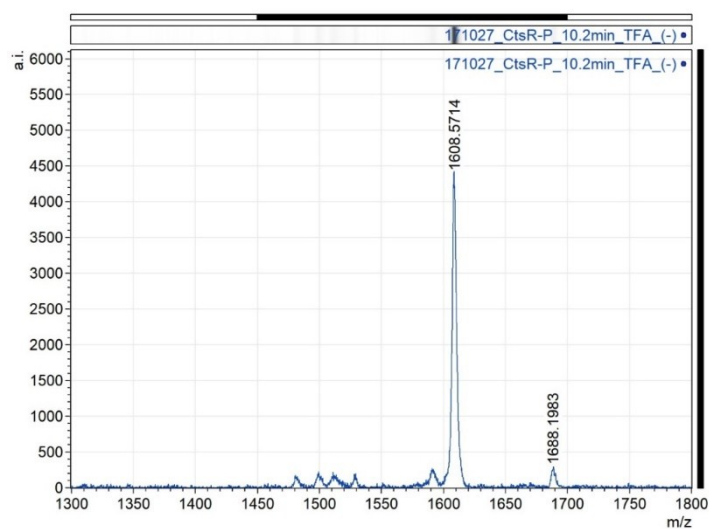

## Sox-CtsR(-3): Ac-KIVC(Sox)SKRGGGGYIK-NH<sub>2</sub>

### HPLC

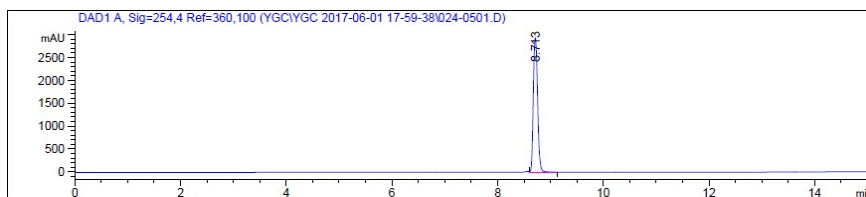

| Peak # | RetTime [min] | Width [min] | Area [mAU*s] | Height [mAU] | Area %   |
|--------|---------------|-------------|--------------|--------------|----------|
| 1      | 8.713         | 0.0922      | 1.66805e4    | 2940.28271   | 100.0000 |

ESI-MS (HR-MS): a. Calculated  $[M+2H]^{+2}$ : 885.9607 m/z, Observed  $[M+2H]^{+2}$ : 885.9605 m/z/ b. Calculated  $[M+3H]^{+3}$ : 590.9762 m/z, Observed  $[M+3H]^{+3}$ : 590.9763 m/z/ c. Calculated  $[M+4H]^{+4}$ : 443.4840 m/z, Observed  $[M+4H]^{+4}$ : 443.4841 m/z

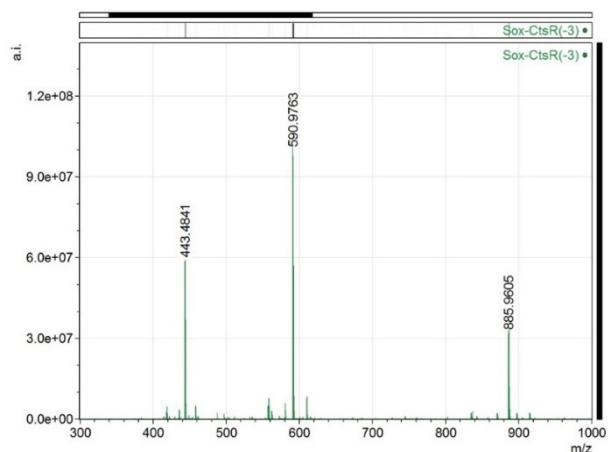

## Sox-CtsR(-3)P: Ac-KIVC(Sox)SKpRGGGGYIK-NH<sub>2</sub>

### LC-MS/MS (ETD)

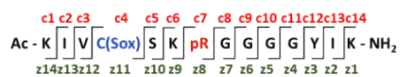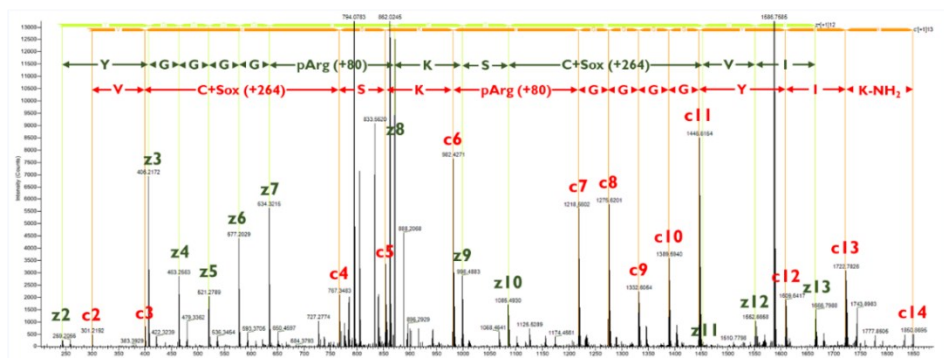

# **Sox-CtsR(-2): Ac-KIVQC(Sox)KRGGGGYIK-NH<sub>2</sub>**

## HPLC

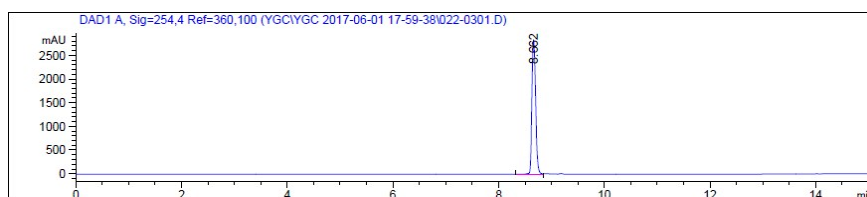

| Peak # | RetTime [min] | Width [min] | Area [mAU*s] | Height [mAU] | Area %   |
|--------|---------------|-------------|--------------|--------------|----------|
| 1      | 8.662         | 0.0769      | 1.38599e4    | 2844.07178   | 100.0000 |

ESI-MS (HR-MS): a. Calculated  $[M+2H]^{+2}$ : 906.4740 m/z, Observed  $[M+2H]^{+2}$ : 906.4739 m/z / b. Calculated  $[M+3H]^{+3}$ : 604.6518 m/z, Observed  $[M+3H]^{+3}$ : 604.6518 m/z / c. Calculated  $[M+4H]^{+4}$ : 453.7406 m/z, Observed  $[M+4H]^{+4}$ : 453.7412 m/z

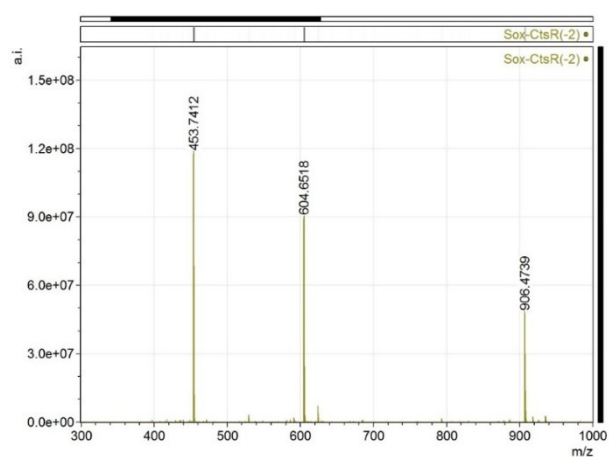

# **Sox-CtsR(-2)P: Ac-KIVQC(Sox)KpRGGGGYIK-NH<sub>2</sub>**

## HPLC

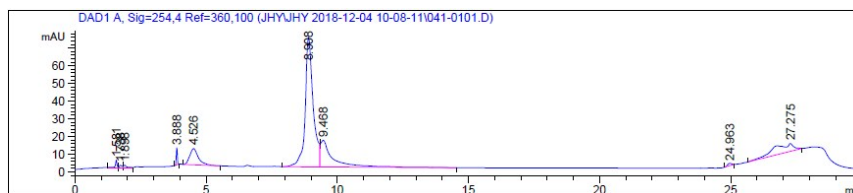

| Peak # | RetTime [min] | Width [min] | Area [mAU*s] | Height [mAU] | Area %  |
|--------|---------------|-------------|--------------|--------------|---------|
| 1      | 1.581         | 0.0614      | 16.82093     | 4.14264      | 0.6449  |
| 2      | 1.738         | 0.0893      | 7.84892      | 1.28475      | 0.3009  |
| 3      | 1.898         | 0.1163      | 11.03064     | 1.30892      | 0.4229  |
| 4      | 3.888         | 0.0469      | 27.09406     | 9.60934      | 1.0387  |
| 5      | 4.526         | 0.3385      | 211.37035    | 9.18468      | 8.1036  |
| 6      | 8.908         | 0.3049      | 1553.35803   | 73.40982     | 59.5529 |
| 7      | 9.468         | 0.4396      | 500.21930    | 15.05800     | 19.1775 |
| 8      | 24.963        | 0.1717      | 13.43851     | 1.26728      | 0.5152  |
| 9      | 27.275        | 0.7438      | 267.18454    | 4.39140      | 10.2434 |

MALDI-TOF (Linear-Negative mode): Calculated [M-H]<sup>-</sup>: 1809.9262 m/z, Observed [M-H]<sup>-</sup>: 1808.9624 m/z, Calculated [pM-H]<sup>-</sup>: 1889.8925 m/z, Observed [pM-H]<sup>-</sup>: 1888.4409 m/z

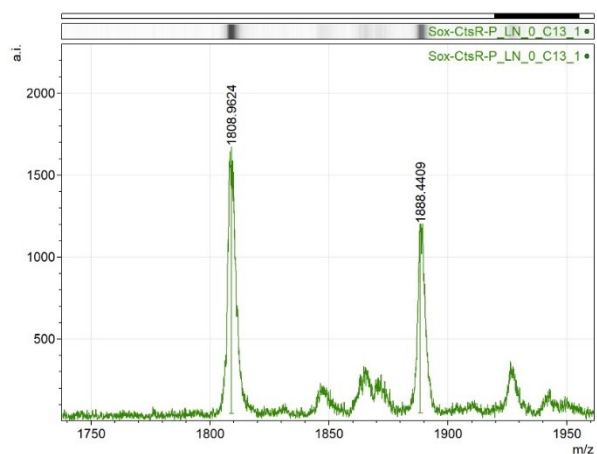

# LC-MS/MS (ETD)

<sup>c1 c2 c3 c4 c5 c6 c7 c8 c9 c10 c11 c12 c13 c14</sup>  
 Ac - K [I] [V] [Q] [C(Sox)] K [pR] [G] [G] [G] [Y] [I] K - NH<sub>2</sub>  
 z14 z13 z12 z11 z10 z9 z8 z7 z6 z5 z4 z3 z2 z1

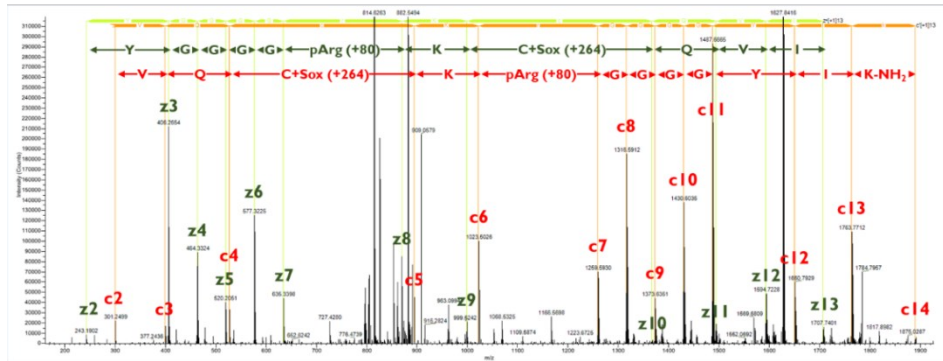

## Sox-CtsR(-1): Ac-KIVQSC(Sox)RGGGGYIK-NH<sub>2</sub>

### HPLC

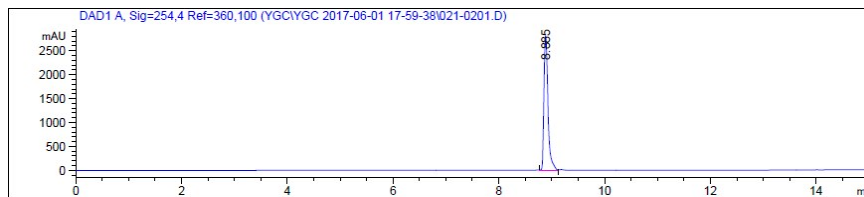

| Peak # | RetTime [min] | Width [min] | Area [mAU*s] | Height [mAU] | Area %   |
|--------|---------------|-------------|--------------|--------------|----------|
| 1      | 8.885         | 0.0816      | 1.48744e4    | 2815.06128   | 100.0000 |

ESI-MS (HR-MS): a. Calculated  $[M+2H]^{+2}$ : 885.9425 m/z, Observed  $[M+2H]^{+2}$ : 885.9424 m/z / b.

Calculated  $[M+3H]^{+3}$ : 590.9641 m/z, Observed  $[M+3H]^{+3}$ : 590.9641 m/z

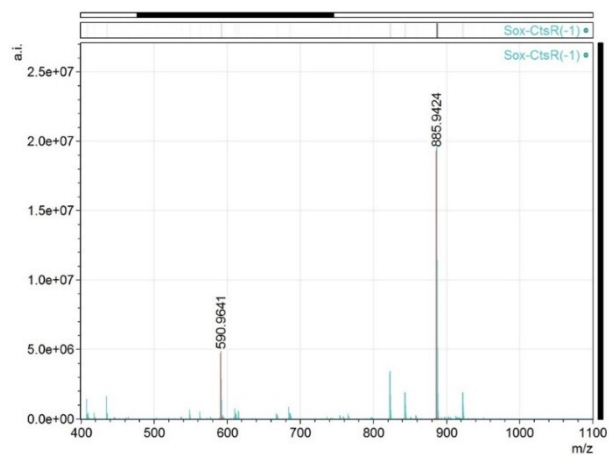

## Sox-CtsR(-1)P: Ac-KIVQSC(Sox)pRGGGGYIK-NH<sub>2</sub>

### LC-MS/MS (ETD)

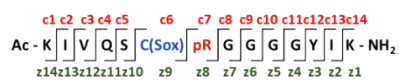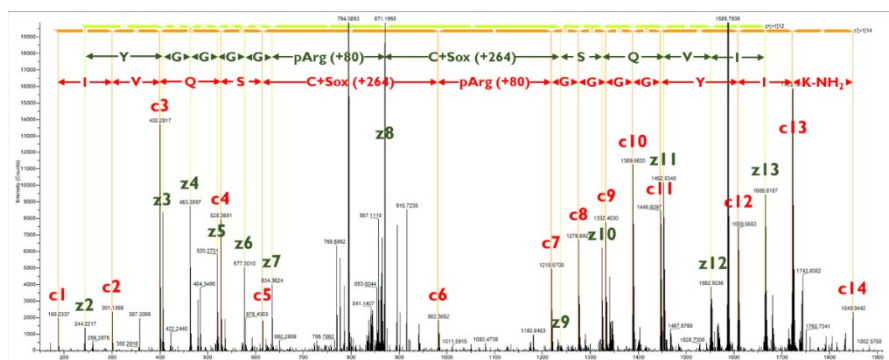

# **Sox-CtsR(+1): Ac-KIVQSKRC(Sox)GGGYIK-NH<sub>2</sub>**

## HPLC

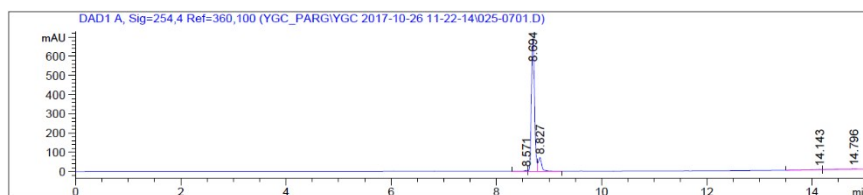

| Peak # | RetTime [min] | Width [min] | Area [mAU*s] | Height [mAU] | Area %  |
|--------|---------------|-------------|--------------|--------------|---------|
| 1      | 8.571         | 0.0621      | 15.14617     | 3.67534      | 0.4646  |
| 2      | 8.694         | 0.0639      | 2846.69702   | 693.35034    | 87.3151 |
| 3      | 8.827         | 0.0686      | 325.24374    | 72.15897     | 9.9760  |
| 4      | 14.143        | 0.1324      | 16.17807     | 1.62144      | 0.4962  |
| 5      | 14.796        | 0.3543      | 56.99352     | 1.97729      | 1.7481  |

ESI-MS (HR-MS): a. Calculated  $[M+2H]^{+2}$ : 921.4793 m/z, Observed  $[M+2H]^{+2}$ : 921.4787 m/z / b. Calculated  $[M+3H]^{+3}$ : 614.6553 m/z, Observed  $[M+3H]^{+3}$ : 614.6559 m/z

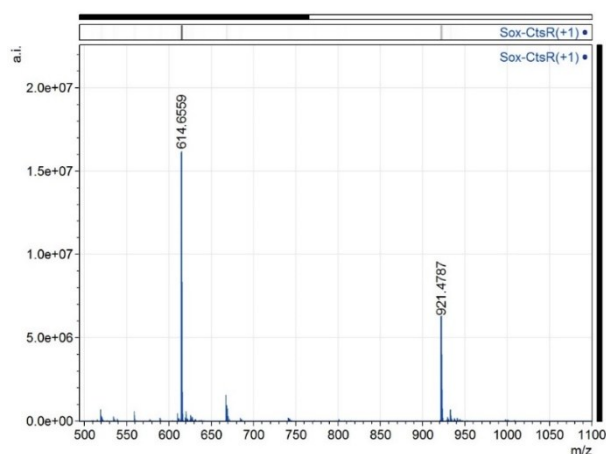

# Sox-CtsR(+1)P: Ac-KIVQSKpRC(Sox)GGGYIK-NH<sub>2</sub>

LC-MS/MS (ETD)

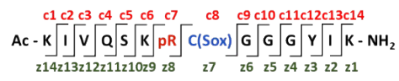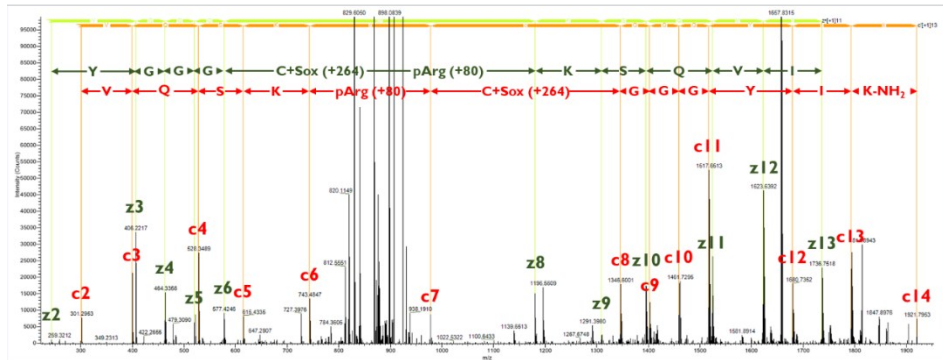



**Sox-CtsR(+2): Ac-KIVQSKRGC(Sox)GGYIK-NH<sub>2</sub>**

**HPLC**

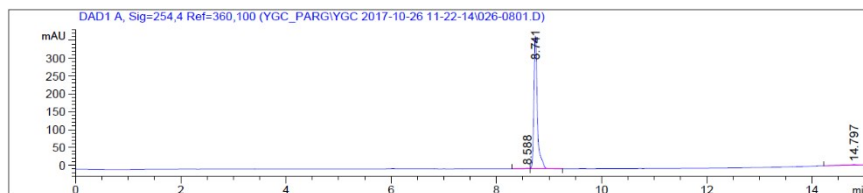

| Peak # | RetTime [min] | Width [min] | Area [mAU*s] | Height [mAU] | Area %  |
|--------|---------------|-------------|--------------|--------------|---------|
| 1      | 8.588         | 0.0706      | 7.31772      | 1.56339      | 0.4193  |
| 2      | 8.741         | 0.0698      | 1715.91870   | 371.89633    | 98.3145 |
| 3      | 14.797        | 0.1832      | 22.09989     | 1.57982      | 1.2662  |

ESI-MS (HR-MS): a. Calculated  $[M+2H]^{+2}$ : 921.4793 m/z, Observed  $[M+2H]^{+2}$ : 921.4788 m/z / b. Calculated  $[M+3H]^{+3}$ : 614.6553 m/z, Observed  $[M+3H]^{+3}$ : 614.6554 m/z

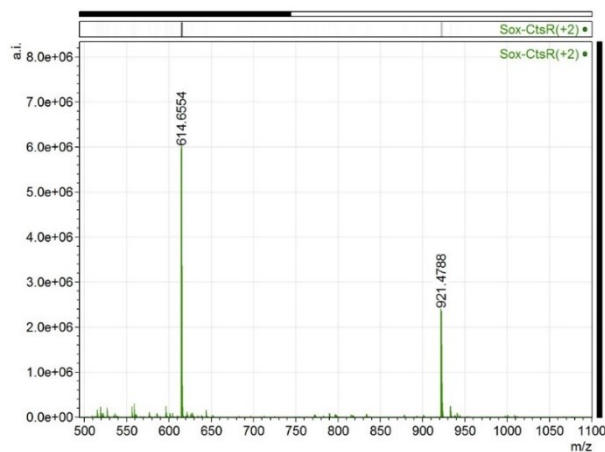

# Sox-CtsR(+2)P: Ac-KIVQSKpRGC(Sox)GGYIK-NH<sub>2</sub>

## LC-MS/MS (ETD)

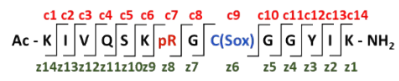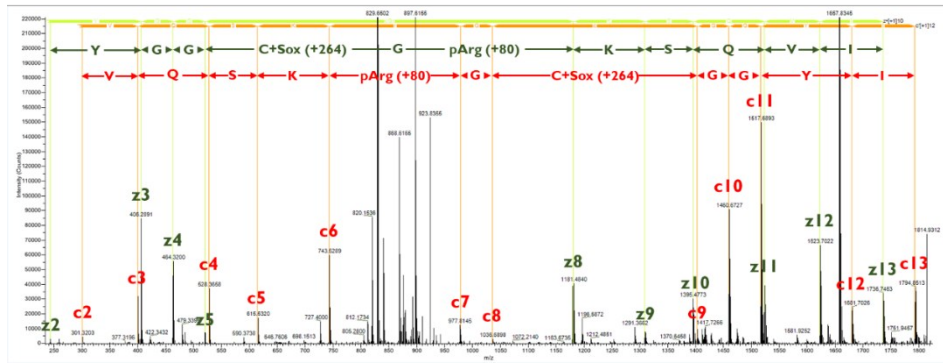

# **Sox-CtsR(+3): Ac-KIVQSKRGGC(Sox)GYIK-NH<sub>2</sub>**

## HPLC

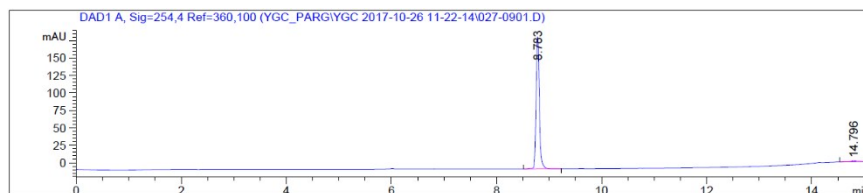

| Peak # | RetTime [min] | Width [min] | Area [mAU*s] | Height [mAU] | Area %  |
|--------|---------------|-------------|--------------|--------------|---------|
| 1      | 8.783         | 0.0656      | 809.05225    | 190.27736    | 98.8952 |
| 2      | 14.796        | 0.0977      | 9.03851      | 1.32335      | 1.1048  |

ESI-MS (HR-MS): a. Calculated  $[M+2H]^{+2}$ : 921.4793 m/z, Observed  $[M+2H]^{+2}$ : 921.4786 m/z / b. Calculated  $[M+3H]^{+3}$ : 614.6553 m/z, Observed  $[M+3H]^{+3}$ : 614.6563 m/z

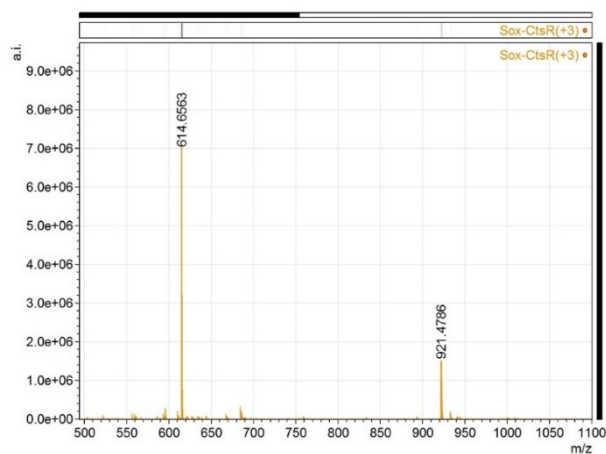

## Sox-CtsR(+3)P: Ac-KIVQSKpRGGC(Sox)GYIK-NH<sub>2</sub>

LC-MS/MS (ETD)

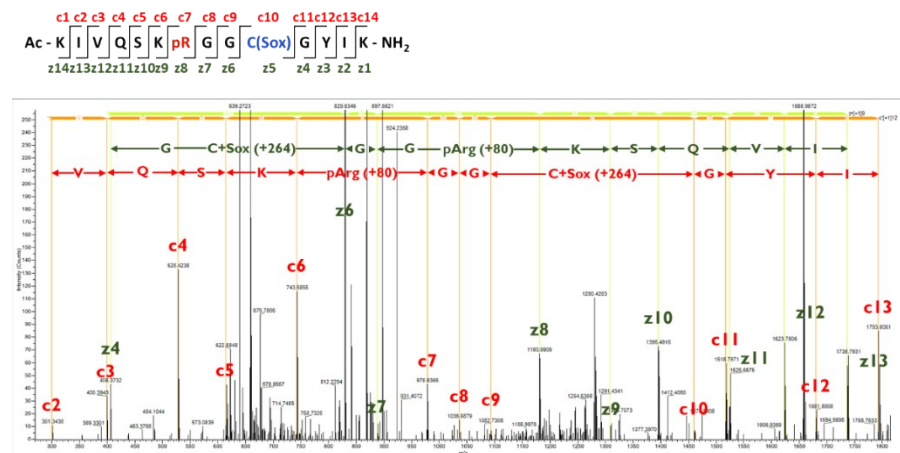

## References

- <sup>1</sup> T. Unger, Y. Jacobovitch, A. Dantes, R. Bernheim and Y. Peleg, *J. Struct. Biol.*, 2010, **172**, 34.
- <sup>2</sup> V. Varik, S. R. A. Oliveira, V. Hauryliuk, and T. Tenson, *Sci. Rep.*, 2017, **7**, 11022.
- <sup>3</sup> A. Lehner, Masters Thesis, University of Vienna, Universitätsring, Wien, 2010.
- <sup>4</sup> D. B. Trentini, M. J. Suskiewicz, A. Heuck, R. Kurzbauer, L. Deszcz, K. Mechtler, and T. Clausen, *Nature*, 2016, **539**, 48.
- <sup>5</sup> J. R. Beck, L. B. Peterson, B. Imperiali, and C. I. Stains, *Curr. Protoc. Chem. Biol.*, 2014, **6**, 135.
- <sup>6</sup> E. Luković, J. A. González-Vera, and B. Imperiali, *J. Am. Chem. Soc.*, 2008, **130**, 12821.
